# Supplementary material for: Facile synthesis of ultrathin and perpendicular NiMn2O4 nanosheets on reduced graphene oxide as advanced electrodes for supercapacitors
Source: Royal Society of Chemistry journal article supplement (doi:10.1039/c8qi00121a), 2018-01-01
Supplement: c8qi00121a1.pdf [file c8qi00121a1.pdf]

## Supporting Information

### **Facile synthesis of ultrathin and perpendicular NiMn<sub>2</sub>O<sub>4</sub> nanosheets on reduced graphene oxide as advanced electrodes for supercapacitors**

Long Li <sup>a</sup>, Hongli Hu <sup>a,\*</sup>, Shujiang Ding <sup>b</sup>

<sup>a</sup>School of Electrical Engineering, State Key Laboratory of Electrical Insulation and Power Equipment, Xi'an Jiaotong University, Xi'an 710049, China

<sup>b</sup>Department of Applied Chemistry, School of Science, MOE Key Laboratory for Nonequilibrium Synthesis and Modulation of Condensed Matter, State Key Laboratory for Mechanical Behavior of Materials, Xi'an Jiaotong University, Xi'an 710049, China

\* Corresponding author.

E-mail address: hlhu@mail.xjtu.edu.cn (H. Hu).

lilong217@163.com; lilong.217@stu.xjtu.edu.cn (L. Li).

dingsj@mail.xjtu.edu.cn (S. D).

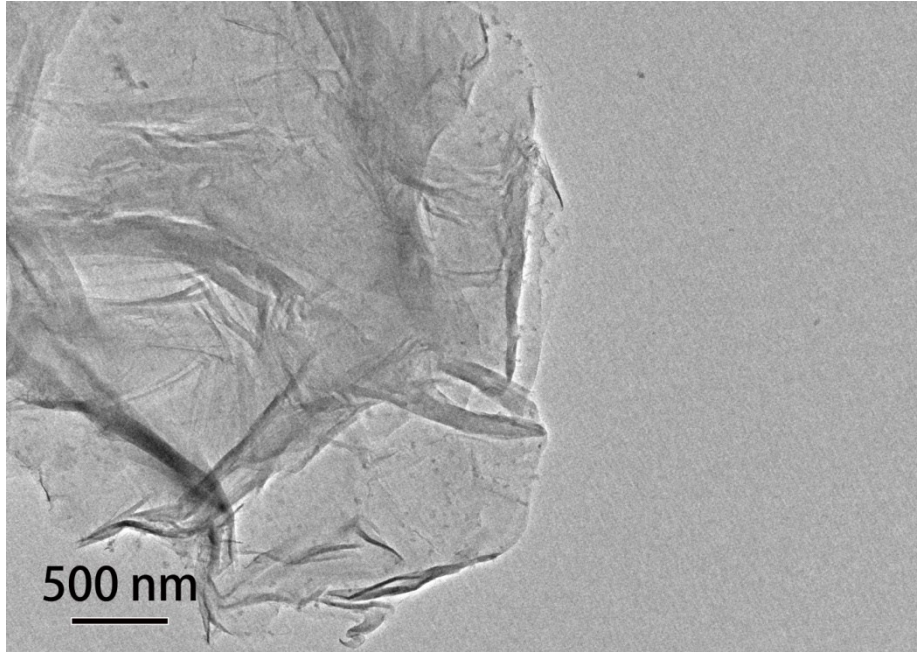

Fig. S1 TEM image of rGO nanosheets.

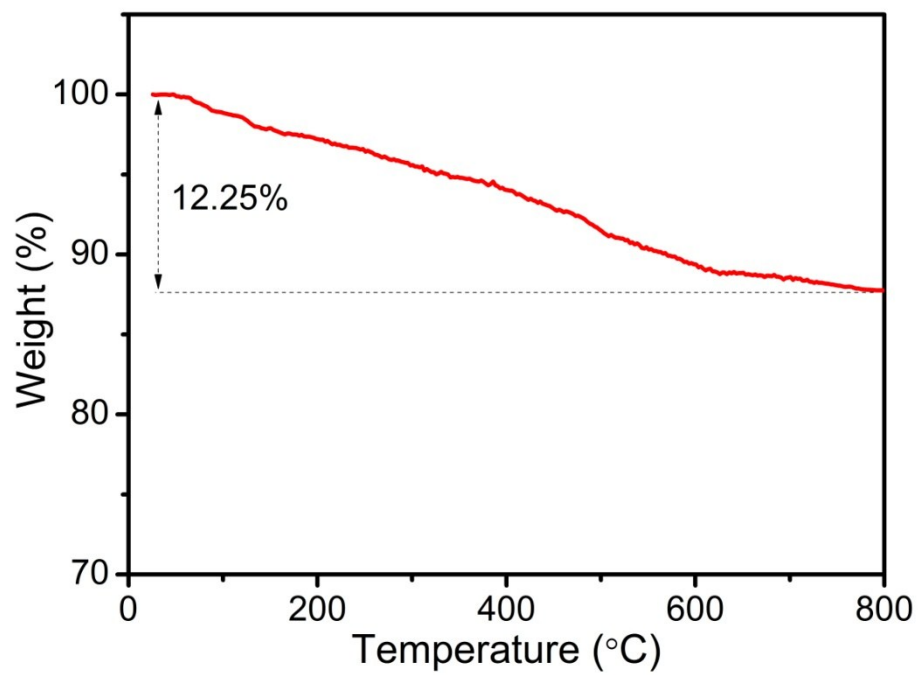

Fig. S2 TG analysis of NiMn<sub>2</sub>O<sub>4</sub> NSs@rGO in air at a heating rate of 10°C min<sup>-1</sup>.
